# Supplementary material
Source: publisher figshare collection journal article supplement (https://geolsoc.figshare.com/ndownloader/files/30703131)
Supplement: Supplementary file 1 [file 30703131]

## Sheet: QFL
Q: mobocrystalline+polycristalline quartz; F: feldspars; L: lithic fragments;
Vc: very coarse sand fraction; C: coarse sand fraction; m: medium
sand fraction; f: fine sand fraction; Vf: very fine sand fraction.
Sample	Q (%)	F (%)	L (%)		Sample	Q (%)	F (%)	L (%)
STR-1-Vc	0	1.93798	98.062		SA-1-Vc	0	0.574713	99.4253
STR-1-C	0	2.30548	97.6945		SA-1-C	2.07792	5.19481	92.7273
STR-1-m	0	5.23077	94.7692		SA-1-m	1.39276	13.649	84.9582
STR-1-f	0	16.3934	83.6066		SA-1-f	7.24638	13.4058	79.3478
STR-1-Vf	0	32.243	67.757		SA-1-Vf	5.52147	15.9509	78.5276
STR-2-m	0	2.17391	97.8261		SA-2-m	0	14.5299	85.4701
STR-3-m	0	6.39535	93.6047		SA-3-m	1.06762	13.1673	85.7651
STR-4-m	0	6.26866	93.7313		SA-4-m	0	10.4956	89.5044
STR-5-m	0	6.43275	93.5673		SA-5-m	0.795756	7.42706	91.7772
STR-7-m	0	5.64972	94.3503		SA-6-m	0	7.96915	92.0308
STR-8-m	0	4.98339	95.0166		SA-7-m	0	7.71208	92.2879
STR-9-Vc	0	0	100		SA-8-m	0.900901	15.3153	83.7838
STR-9-C	0	0.508906	99.4911		SA-9-m	0	14.0401	85.9599
STR-9-m	0	5.77428	94.2257		SA-10-m	0	13.1965	86.8035
STR-9-f	0	10.411	89.589		SA-11-m	0	14.3695	85.6305
STR-9-Vf	0	10.411	89.589		SA-12-m	0	19.3846	80.6154
PN-1-Vc	0	8.51064	91.4894		SA-13-m	0.884956	12.6844	86.4307
PN-1-C	0	18.5507	81.4493		SA-14-m	0	15.7459	84.2541
PN-1-m	0	27.1242	72.8758		SA-15-m	0	11.9481	88.0519
PN-1-f	0	18.75	81.25		Fi-1-m	0	5.28169	94.7183
PN-1-Vf	0	21.6667	78.3333		Fi-2-m	0	10.6825	89.3175
PN-2-m	3.36788	8.29016	88.342		Fi-3-Vc	0	2.4	97.6
PN-3-m	1.6129	8.87097	89.5161		Fi-3-C	0	4.90956	95.0904
PN-4-m	0.515464	3.09278	96.3918		Fi-3-m	0	10.3723	89.6277
PN-5-m	0.506329	18.7342	80.7595		Fi-3-f	0	9.43396	90.566
PN-6-m	3.59897	7.96915	88.4319		Fi-3-Vf	0	4.72222	95.2778
PN-7-m	3.39943	10.7649	85.8357		Fi-4-m	0	9.55414	90.4459
PN-8-m	5.34351	12.9771	81.6794		AL-1-m	1.69972	14.4476	83.8527
PN-9-m	5.05618	17.9775	76.9663		AL-2-m	0	14.9215	85.0785
PN-10-m	2.3622	6.56168	91.0761		AL-3-Vc	0	6.12245	93.8776
PN-11-m	3.37662	13.5065	83.1169		AL-3-C	0	4.8	95.2
V1-m	0.423729	14.4068	85.1695		AL-3-m	0	14.7727	85.2273
V1-f	0	35.6757	64.3243		AL-3-f	0	16.4223	83.5777
V2-m	0	11.0738	88.9262		AL-3-Vf	0	19.3548	80.6452
V2-f	0	33.617	66.383		AL-4-C	0	3.14961	96.8504
V4-m	0	15.5116	84.4884		AL-5-m	0	9.26966	90.7303
V4-f	0	21.3235	78.6765		AL-6-m	0	6.21469	93.7853
V5-m	0	10.7527	89.2473		AL-7-m	0	8.1571	91.8429
V5-f	0	14.0762	85.9238
V6-m	0	12.5654	87.4346
V6-f	0	10.8635	89.1365
V7-m	2.6936	14.4781	82.8283
V7-f	1.44404	15.8845	82.6715
V8-m	0	8.02292	91.9771
V8-f	0	19.8777	80.1223
V9-m	0	13.1356	86.8644
V9-f	0	15.8845	84.1155
V10-m	0	14.7335	85.2665
V10-f	0	15.0685	84.9315
V11-m	0	18.1507	81.8493
V11-f	0	17.608	82.392
V12-m	0	24.4186	75.5814
V12-f	0	14.6789	85.3211
L1-m	0	5.88235	94.1176
L1-f	0	26.7797	73.2203
L2-m	0	5.78512	94.2149
L2-f	0	22.2222	77.7778
L4-m	0	10.9375	89.0625
L4-f	0	16.5217	83.4783
L5-m	0.511509	4.09207	95.3964
L5-f	1.00334	13.3779	85.6187
L6-m	0.274725	2.74725	96.978
L6-f	0.623053	8.41121	90.9657
L7-m	0	2.92398	97.076
L7-f	0.362319	4.34783	95.2899
L8-m	0	1.88679	98.1132
L8-f	0.584795	10.8187	88.5965
L9-m	0.283286	16.1473	83.5694
L9-f	0	30.303	69.697
L10-m	0.296736	24.6291	75.0742
L10-f	2.01729	29.683	68.2997
L11-m	1.40351	24.2105	74.386
L11-f	2.89855	35.7488	61.3527
L12-m	1.04987	11.5486	87.4016
L12-f	3.31492	13.8122	82.8729
L13-m	1.52672	1.78117	96.6921
L13-f	0.25974	3.11688	96.6234

## Sheet: Lvl_Lvmi_Lvv
Lvv: vitric texture; Lvmi: microlitic texture; Lvl: lathwork texture.
Vc: very coarse sand fraction; C: coarse sand fraction; m: medium
sand fraction; f: fine sand fraction; Vf: very fine sand fraction.
Sample	Lvv (%)	Lvmi (%)	Lvl (%)		Sample	Lvv (%)	Lvmi (%)	Lvl (%)		Composition vs grain-size
STR-1-m	20.3883	23.9482	55.6634		SA-1-m	15.9322	27.4576	56.6102		Sample	Lvv (%)	Lvmi (%)	Lvl (%)
STR-2-m	8.14815	11.8519	80		SA-2-m	16.0142	25.6228	58.363		SA-1-Vc	9.24855	12.4277	78.3237
STR-3-m	2.17391	19.5652	78.2609		SA-3-m	11.2033	25.7261	63.0705		SA-1-C	10.1744	23.5465	66.2791
STR-4-m	7.32484	19.4268	73.2484		SA-4-m	14.3791	28.4314	57.1895		SA-1-m	15.9322	27.4576	56.6102
STR-5-m	12.1875	21.875	65.9375		SA-5-m	22.4913	27.3356	50.173		SA-1-f	33.0189	50	16.9811
STR-7-m	6.9697	25.4545	67.5758		SA-6-m	16	18.5714	65.4286		SA-1-Vf	77.3438	22.6562	0
STR-8-m	6.99301	16.4336	76.5734		SA-7-m	14.2061	13.0919	72.7019		Fi-3-Vc	6.53061	7.7551	85.7143
STR-9-m	13.9276	19.2201	66.8524		SA-8-m	9.67742	20.4301	69.8925		Fi-3-C	5.97826	12.5	81.5217
PN-1-m	32.5	31.5	36		SA-9-m	14.8148	20.5387	64.6465		Fi-3-m	13.3531	26.4095	60.2374
PN-2-m	0.58651	47.5073	51.9062		SA-10-m	14.8649	30.4054	54.7297		Fi-3-f	10.219	53.2847	36.4964
PN-3-m	1.20482	49.0964	49.6988		SA-11-m	12.069	32.069	55.8621		Fi-3-Vf	27.1137	56.5598	16.3265
PN-4-m	14.2415	36.2229	49.5356		SA-12-m	5.09804	33.3333	61.5686		AL-3-Vc	11.3537	8.29694	80.3493
PN-5-m	41.1184	31.25	27.6316		SA-13-m	3.16901	33.8028	63.0282		AL-3-C	13.5501	15.9892	70.4607
PN-6-m	45.1505	18.7291	36.1204		SA-14-m	10.4167	20.8333	68.75		AL-3-m	22.6667	24.6667	52.6667
PN-7-m	8.4	25.6	66		SA-15-m	9.96564	37.1134	52.921		AL-3-f	17.5439	44.5614	37.8947
PN-8-m	7.04698	32.8859	60.0671		Fi-1-m	11.1524	30.1115	58.7361		AL-3-Vf	33.6	50.8	15.6
PN-9-m	7.57576	39.0152	53.4091		Fi-2-m	9.21659	33.1797	57.6037		PN-1-Vc	1.99203	6.77291	91.2351
PN-10-m	11.6352	33.6478	54.717		Fi-3-m	13.3531	26.4095	60.2374		PN-1-C	3.39623	16.6038	80
PN-11-m	13.3333	38.6667	48		Fi-4-m	8.80282	26.7606	64.4366		PN-1-m	32.5	31.5	36
V1-m	5.52764	19.598	74.8744		AL-1-m	14.1379	27.931	57.931		PN-1-f	34.9112	44.9704	20.1183
V2-m	2.7451	17.6471	79.6078		AL-2-m	4.92308	16.3077	78.7692		PN-1-Vf	51.4124	43.5028	5.08475
V4-m	2.83019	37.7358	59.434		AL-3-m	22.6667	24.6667	52.6667		STR-1-Vc	3.16206	0.790514	96.0474
V5-m	1.27796	36.1022	62.6198		AL-4-C	13.8211	19.7832	66.3957		STR-1-C	5.89971	7.66962	86.4307
V6-m	2.50784	32.6019	64.8903		AL-5-m	15.4799	13.6223	70.8978		STR-1-m	20.3883	23.9482	55.6634
V7-m	1.81818	26.8182	71.3636		AL-6-m	9.63855	23.7952	66.5663		STR-1-f	24.6094	37.1094	38.2812
V8-m	3.10345	32.4138	64.4828		AL-7-m	12.5	19.0789	68.4211		STR-1-Vf	37.931	48.9655	13.1034
V9-m	1.95122	21.9512	76.0976							STR-9-Vc	8.37696	7.32984	84.2932
V10-m	0.371747	16.3569	83.2714							STR-9-C	7.41688	7.67263	84.9105
V11-m	2.92887	41.841	55.2301							STR-9-m	13.9276	19.2201	66.8524
V12-m	5.38462	27.6923	66.9231							STR-9-f	22.3242	32.7217	44.9541
L1-m	8.27338	21.9424	69.7842							STR-9-Vf	59.3272	26.9113	13.7615
L2-m	6.73759	26.5957	66.6667
L4-m	10.7362	37.7301	51.5337
L5-m	40.9524	20.9524	38.0952
L6-m	38.785	22.8972	38.3178
L7-m	10.4575	11.7647	77.7778
L8-m	31.962	19.3038	48.7342
L9-m	18.2156	26.7658	55.0186
L10-m	6.14035	30.2632	63.5965
L11-m	36.5079	21.164	42.328
L12-m	45.2096	28.1437	26.6467
L13-m	53.1165	29.2683	17.6152

## Sheet: Lvf_Lvmi_Lvl
Lvf: felsitic texture; Lvmi: microlitic texture; Lvl: lathwork texture.
Vc: very coarse sand fraction; C: coarse sand fraction; m: medium
sand fraction; f: fine sand fraction; Vf: very fine sand fraction.
Sample	Lvf (%)	Lvmi (%)	Lvl (%)		Sample	Lvf (%)	Lvmi (%)	Lvl (%)
PN-1-Vc	2.38095	6.74603	90.873		AL-3-Vf	0	76.506	23.494
PN-1-C	5.53506	16.2362	78.2288		AL-4-C	0	22.956	77.044
PN-1-m	11.7647	41.1765	47.0588		AL-5-m	0	16.1172	83.8828
PN-1-f	12	60.8	27.2		AL-6-m	0	26.3333	73.6667
PN-1-Vf	11.3402	79.3814	9.27835		AL-7-m	0	21.8045	78.1955
PN-2-m	0	47.7876	52.2124		V1-m	0	20.7447	79.2553
PN-3-m	0	49.6951	50.3049		V1-f	0.970874	45.6311	53.3981
PN-4-m	5.17241	40.3448	54.4828		V2-m	0	18.1452	81.8548
PN-5-m	2.18579	51.9126	45.9016		V2-f	0	50	50
PN-6-m	6.28571	32	61.7143		V4-m	7.62332	35.8744	56.5022
PN-7-m	17.6259	23.0216	59.3525		V4-f	2.43902	59.7561	37.8049
PN-8-m	7.35786	32.7759	59.8662		V5-m	0.996678	33.887	65.1163
PN-9-m	2.4	41.2	56.4		V5-f	0	51.4925	48.5075
PN-10-m	3.43643	36.7698	59.7938		V6-m	2.30263	34.2105	63.4868
PN-11-m	1.51515	43.9394	54.5455		V6-f	0.657895	56.25	43.0921
STR-1-Vc	0	0.816327	99.1837		V7-m	2.38095	28.0952	69.5238
STR-1-C	0	8.15047	91.8495		V7-f	0	55.4502	44.5498
STR-1-m	0.826446	30.5785	68.595		V8-m	0.729927	34.3066	64.9635
STR-1-f	0	49.2228	50.7772		V8-f	0	57.7093	42.2907
STR-1-Vf	1.0989	78.022	20.8791		V9-m	0	22.3881	77.6119
STR-2-m	0	12.9032	87.0968		V9-f	0	60.1852	39.8148
STR-3-m	0	20	80		V10-m	0	16.4179	83.5821
STR-4-m	0	20.9622	79.0378		V10-f	0	54.7325	45.2675
STR-5-m	0	24.911	75.089		V11-m	0	42.6009	57.3991
STR-7-m	0	27.3616	72.6384		V11-f	0	59.5142	40.4858
STR-8-m	0	17.6692	82.3308		V12-m	0	29.2683	70.7317
STR-9-Vc	0	5.09091	94.9091		V12-f	0	36.2637	63.7363
STR-9-C	0	8.28729	91.7127		L1-m	1.5625	12.8125	85.625
STR-9-m	0	22.3301	77.6699		L1-f	0	57.8125	42.1875
STR-9-f	0	42.126	57.874		L2-m	12.5402	19.9357	67.5241
STR-9-Vf	0	66.1654	33.8346		L2-f	8.63309	51.0791	40.2878
SA-1-Vc	0	13.6943	86.3057		L4-m	1.5674	44.2006	54.232
SA-1-C	1.27796	25.8786	72.8435		L4-f	0.384615	59.6154	40
SA-1-m	0	32.6613	67.3387		L5-m	26.5823	31.0127	42.4051
SA-1-f	0	74.6479	25.3521		L5-f	12.3348	56.3877	31.2775
SA-1-Vf	0	100	0		L6-m	51.0067	18.4564	30.5369
SA-2-m	0	30.5085	69.4915		L6-f	42.4242	25.1082	32.4675
SA-3-m	0	28.972	71.028		L7-m	8.55263	6.57895	84.8684
SA-4-m	0	33.2061	66.7939		L7-f	31.2925	33.3333	35.3741
SA-5-m	0	35.2679	64.7321		L8-m	16.2162	25.8687	57.9151
SA-6-m	0	22.1088	77.8912		L8-f	18.75	54.0179	27.2321
SA-7-m	0	15.2597	84.7403		L9-m	8.91473	28.2946	62.7907
SA-8-m	0	22.619	77.381		L9-f	3.8961	54.5455	41.5584
SA-9-m	0	24.1107	75.8893		L10-m	14.2857	20.9524	64.7619
SA-10-m	0	35.7143	64.2857		L10-f	12.6263	42.9293	44.4444
SA-11-m	0	36.4706	63.5294		L11-m	15.4412	25.7353	58.8235
SA-12-m	0	35.124	64.876		L11-f	12.6582	39.2405	48.1013
SA-13-m	0	34.9091	65.0909		L12-m	8.87574	39.0533	52.071
SA-14-m	0	23.2558	76.7442		L12-f	10.1124	41.573	48.3146
SA-15-m	0	36.3636	63.6364		L13-m	10.596	47.6821	41.7219
Fi-1-m	0	33.8912	66.1088		L13-f	0.473934	93.8389	5.6872
Fi-2-m	0	27.4809	72.5191		Fi-3-m	0	30.4795	69.5205
Fi-3-Vc	0	8.29694	91.7031		Fi-3-f	0	47.4026	52.5974
Fi-3-C	0	13.1805	86.8195		Fi-3-Vf	0	77.6	22.4
AL-2-m	0	17.1521	82.8479		Fi-4-m	0	29.3436	70.6564
AL-3-Vc	0	9.35961	90.6404		AL-1-m	0.4	32.4	67.2
AL-3-C	0	18.4953	81.5047		AL-3-m	0	31.8966	68.1034
AL-3-f	0	54.0426	45.9574

## Sheet: Lvvclgl_Lvvbrgl_Lvvblgl
Lvvclgl: colorless vitric texture; Lvvbrgl: brown vitric texture; Lvvblgl: black vitric texture.
Vc: very coarse sand fraction; C: coarse sand fraction; m: medium
sand fraction; f: fine sand fraction; Vf: very fine sand fraction.
Samples	Lvvclgl (%)	Lvvbrgl (%)	Lvvblgl (%)		Samples	Lvvclgl (%)	Lvvbrgl (%)	Lvvblgl (%)
V1-m	0	9.09091	90.9091		AL-1-m	0	37.931	62.069
V1-f	0	33.3333	66.6667		AL-2-m	0	43.75	56.25
V2-m	0	0	100		AL-3-Vc	0	45	55
V2-f	0	4.34783	95.6522		AL-3-C	0	42.1053	57.8947
V4-m	0	0	100		AL-3-m	0	44.1176	55.8824
V4-f	5.88235	23.5294	70.5882		AL-3-f	0	48	52
V5-m	0	23.0769	76.9231		AL-3-Vf	0	39.4737	60.5263
V5-f	9.09091	9.09091	81.8182		AL-4-C	0	45.098	54.902
V6-m	0	47.3684	52.6316		AL-5-m	0	30.9524	69.0476
V6-f	0	7.69231	92.3077		AL-6-m	0	32.1429	67.8571
V7-m	0	46.6667	53.3333		AL-7-m	0	39.3939	60.6061
V7-f	0	22.2222	77.7778		PN-1-Vc	20	40	40
V8-m	70	20	10		PN-1-C	22.2222	55.5556	22.2222
V8-f	0	16.6667	83.3333		PN-1-m	12.5	25	62.5
V9-m	0	33.3333	66.6667		PN-1-f	0	0	100
V9-f	0	11.7647	88.2353		PN-1-Vf	38.2022	11.236	50.5618
V10-m	0	0	100		PN-2-m	100	0	0
V10-f	0	0	100		PN-3-m	100	0	0
V11-m	0	12.5	87.5		PN-4-m	64.2857	35.7143	0
V11-f	0	0	0		PN-5-m	7.14286	0	92.8571
V12-m	0	0	100		PN-6-m	53.6232	20.2899	26.087
V12-f	0	0	100		PN-7-m	0	0	100
L1-m	50	0	50		PN-8-m	63.1579	21.0526	15.7895
L1-f	20	0	80		PN-9-m	35	5	60
L2-m	91.6667	8.33333	0		PN-10-m	60	0	40
L2-f	21.4286	0	78.5714		PN-11-m	8.57143	8.57143	82.8571
L4-m	100	0	0		SA-1-Vc	0	37.5	62.5
L4-f	95.6522	0	4.34783		SA-1-C	0	27.2727	72.7273
L5-m	97.8723	2.12766	0		SA-1-m	0	30.7692	69.2308
L5-f	82.6087	0	17.3913		SA-1-f	4.28571	24.2857	71.4286
L6-m	72.973	24.3243	2.7027		SA-1-Vf	11.1111	36.5079	52.381
L6-f	81.6327	2.04082	16.3265		SA-2-m	5.26316	39.4737	55.2632
L7-m	92.3077	0	7.69231		SA-3-m	0	36.3636	63.6364
L7-f	94.6429	1.78571	3.57143		SA-4-m	0	48.6486	51.3514
L8-m	95.8333	2.08333	2.08333		SA-5-m	0	46.3415	53.6585
L8-f	95.5882	1.47059	2.94118		SA-6-m	0	45.098	54.902
L9-m	94.2857	0	5.71429		SA-7-m	0	48.8372	51.1628
L9-f	96.1538	0	3.84615		SA-8-m	0	51.8519	48.1481
L10-m	61.5385	0	38.4615		SA-9-m	5.26316	60.5263	34.2105
L10-f	46.1538	7.69231	46.1538		SA-10-m	0	58.6207	41.3793
L11-m	77.7778	4.44444	17.7778		SA-11-m	12.9032	19.3548	67.7419
L11-f	53.5714	3.57143	42.8571		SA-12-m	0	30.7692	69.2308
L12-m	91.3043	0.724638	7.97101		SA-13-m	0	22.2222	77.7778
L12-f	77.6699	7.76699	14.5631		SA-14-m	0	25.9259	74.0741
L13-m	90.1961	0.653595	9.15033		SA-15-m	13.7931	44.8276	41.3793
L13-f	22.6415	13.2075	64.1509		Fi-1-m	0	53.3333	46.6667
STR-1-Vc	0	0	100		Fi-2-m	0	50	50
STR-1-C	0	0	100		Fi-3-Vc	0	100	0
STR-1-m	3.22581	0	96.7742		Fi-3-C	0	40.9091	59.0909
STR-1-f	0	1.63934	98.3607		Fi-3-m	0	37.7778	62.2222
STR-1-Vf	1.88679	9.43396	88.6792		Fi-3-f	0	53.5714	46.4286
STR-2-m	9.09091	0	90.9091		Fi-3-Vf	0	40.8602	59.1398
STR-3-m	0	0	100		Fi-4-m	0	28	72
STR-4-m	0	13.0435	86.9565
STR-5-m	0	7.69231	92.3077
STR-7-m	0	4.34783	95.6522
STR-8-m	0	10	90
STR-9-Vc	0	81.25	18.75
STR-9-C	0	27.5862	72.4138
STR-9-m	0	29.1667	70.8333
STR-9-f	0	27.1429	72.8571
STR-9-Vf	1.12994	34.4633	64.4068

## Sheet: Basprov_Andprov_Dacprov
BasProv: basaltic provenance; AndProv: andesitic provenance; DacProv: dacitic
provenance. BasProv= Lvlblgl+Lvmiblgl; AndProv= Lvlbrgl+Lvmibrgl;
DacProv= Lvlgrgl+Lvmigrgl.
Sample	BasProv (%)	AndProv (%)	DacProv (%)		Sample	BasProv (%)	AndProv (%)	DacProv (%)
PN-1-Vc	19	79	2		V1-m	71	24	5
PN-1-C	8.88889	90.2222	0.888889		V1-f	53	41	6
PN-1-m	59.375	40.625	0		V2-m	75.5556	11.5556	12.8889
PN-1-f	58.3333	41.6667	0		V2-f	76.5766	16.2162	7.20721
PN-1-Vf	44.4444	55.5556	0		V4-m	45.3846	54.6154	0
PN-2-m	4.72441	22.8346	72.4409		V4-f	58.3333	41.6667	0
PN-3-m	11.4679	21.5596	66.9725		V5-m	72.5806	23.7903	3.62903
PN-4-m	14.7929	30.1775	55.0296		V5-f	71.2329	24.2009	4.56621
PN-5-m	26.2295	45.9016	27.8689		V6-m	66.8067	26.0504	7.14286
PN-6-m	6.57895	40.7895	52.6316		V6-f	76.4957	20.9402	2.5641
PN-7-m	13.369	17.1123	69.5187		V7-m	69.697	27.2727	3.0303
PN-8-m	17.3228	56.6929	25.9843		V7-f	73.913	23.6025	2.48447
PN-9-m	17.8571	59.375	22.7679		V8-m	69.8198	26.1261	4.05405
PN-10-m	13.1474	43.8247	43.0279		V8-f	74.5946	20.5405	4.86486
PN-11-m	16.8103	10.3448	72.8448		V9-m	87.5	11.9792	0.520833
STR-1-Vc	88.6555	10.5042	0.840336		V9-f	88.2927	11.2195	0.487805
STR-1-C	91.5094	6.60377	1.88679		V10-m	79.2	13.2	7.6
STR-1-m	84.9372	10.0418	5.02092		V10-f	83.9286	13.8393	2.23214
STR-1-f	83.4197	12.4352	4.14508		V11-m	70.9524	25.2381	3.80952
STR-1-Vf	73.3333	24.4444	2.22222		V11-f	89.5735	9.00474	1.4218
STR-2-m	81.4516	14.5161	4.03226		V12-m	83.3333	10.4167	6.25
STR-3-m	79.2079	11.8812	8.91089		V12-f	82.1918	12.3288	5.47945
STR-4-m	70.0704	18.662	11.2676		L1-m	77.3519	12.892	9.7561
STR-5-m	76.9784	15.8273	7.19424		L1-f	79.6703	9.34066	10.989
STR-7-m	68.6469	21.1221	10.231		L2-m	68.6992	20.3252	10.9756
STR-8-m	64.5283	27.9245	7.54717		L2-f	80.531	3.53982	15.9292
STR-9-Vc	34.749	65.251	0		L4-m	75	12.234	12.766
STR-9-C	60.5114	39.4886	0		L4-f	75.2747	19.2308	5.49451
STR-9-m	67.1141	32.5503	0.33557		L5-m	81.875	15.625	2.5
STR-9-f	64.7773	35.2227	0		L5-f	76.7045	13.0682	10.2273
STR-9-Vf	56.3492	43.6508	0		L6-m	71.4286	24.7619	3.80952
SA-1-Vc	32.7922	30.1948	37.013		L6-f	84.4037	11.9266	3.66972
SA-1-C	45.7831	34.1365	20.0803		L7-m	84.6847	14.4144	0.900901
SA-1-m	50.5	38.5	11		L7-f	89.7436	10.2564	0
SA-1-f	64.2857	27.7778	7.93651		L8-m	77.9221	14.9351	7.14286
SA-1-Vf	72.4138	27.5862	0		L8-f	88.7931	10.3448	0.862069
SA-2-m	38.5	45.5	16		L9-m	80.9756	12.6829	6.34146
SA-3-m	47.2362	35.1759	17.5879		L9-f	75.3846	15.3846	9.23077
SA-4-m	58.5774	31.3808	10.0418		L10-m	62.1951	31.7073	6.09756
SA-5-m	40.5263	31.5789	27.8947		L10-f	46.4286	50.7143	2.85714
SA-6-m	47.3077	45.7692	6.92308		L11-m	67.0213	29.7872	3.19149
SA-7-m	52.1595	45.8472	1.99336		L11-f	56.6038	43.3962	0
SA-8-m	50.8197	37.7049	11.4754		L12-m	57.3333	42.6667	0
SA-9-m	43.5146	34.728	21.7573		L12-f	70	30	0
SA-10-m	48.9712	34.1564	16.8724		L13-m	81.6667	18.3333	0
SA-11-m	54.2017	38.2353	7.56303		L13-f	10.0529	89.9471	0
SA-12-m	53.5211	37.0892	9.38967		AL-1-m	53.2751	37.1179	9.60699
SA-13-m	60.7547	35.8491	3.39623		AL-2-m	47.651	52.349	0
SA-14-m	46.5863	45.3815	8.03213		AL-3-Vc	57.4586	42.5414	0
SA-15-m	32.9268	47.9675	19.1057		AL-3-C	59.6491	40.3509	0
Fi-1-m	40.796	45.7711	13.4328		AL-3-m	54.7511	45.2489	0
Fi-2-m	27.3859	72.6141	0		AL-3-f	57.1429	42.8571	0
Fi-3-Vc	39.9123	60.0877	0		AL-3-Vf	57.5163	42.4837	0
Fi-3-C	51.3196	43.695	4.98534		AL-4-C	55.9748	44.0252	0
Fi-3-m	54.2254	45.0704	0.704225		AL-5-m	63.1579	36.8421	0
Fi-3-f	52.9221	47.0779	0		AL-6-m	51.7007	42.517	5.78231
Fi-3-Vf	53.6	46.4	0		AL-7-m	55.3846	40	4.61538
Fi-4-m	44.856	41.9753	13.1687
